# Supplementary material for: A study into the ageing and dating of blue ball tip inks on paper usingin situvisible spectroscopy with chemometrics
Source: Royal Society of Chemistry journal article supplement (doi:10.1039/c8ay01418c), 2018-01-01
Supplement: c8ay01418c1.pdf [file c8ay01418c1.pdf]

## A study into the ageing and dating of blue ball tip inks using in-situ visible spectroscopy with chemometrics

Georgina Sauzier<sup>a,b,\*</sup>, Jasmine McGann<sup>a,b</sup>, Simon W. Lewis<sup>a,b</sup> and Wilhelm van Bronswijk<sup>a</sup>

<sup>a</sup> School of Molecular and Life Sciences, Curtin University, GPO Box U1987, Perth, Western Australia, 6845, Australia.

<sup>b</sup> Curtin Institute of Functional Molecules and Interfaces, Curtin University, GPO Box U1987, Perth, Western Australia, 6845, Australia.

### Supplementary Information

All data associated with this work is available open-access via Research Data Australia;  
DOI: [10.4225/06/5b35e1f822c13](https://doi.org/10.4225/06/5b35e1f822c13)

**Table S1:** Models and assigned numeric identifiers for all pens in the sample population.

| Pen ID | Pen Model                         | Pen ID | Pen Model                         |
|--------|-----------------------------------|--------|-----------------------------------|
| 1      | Bic Cristal                       | 19†*   | Pilot G-2 05                      |
| 2      | Papermate Ink Joy 100             | 20     | Pilot Super Grip                  |
| 3      | Artline Ikonic                    | 21     | Uniball Power Tank                |
| 4      | Deer Ultrafine                    | 22     | Pilot BPS-GP                      |
| 5      | Artline 7210                      | 23†    | PaperMate Profile                 |
| 6      | PaperMate Kilometrico             | 24     | Bic Pro Plus                      |
| 7      | Bic ReAction                      | 25     | PaperMate FlexGrip Elite          |
| 8†     | Celco Retractable                 | 26†    | Pentel Rolly                      |
| 9      | Bic Orange Fine                   | 27     | PaperMate Kilometrico Elite       |
| 10†    | Keji Ballpoint                    | 28     | Staedtler Triplus 426             |
| 11†    | Office Basics Ballpoint           | 29     | Staedtler Stick Click Retractable |
| 12     | Artline Smoove                    | 30     | Pilot BP-145                      |
| 13     | J.Burrows Ballpoint               | 31     | PaperMate FlexGrip Ultra          |
| 14     | Bic Round Stic                    | 32     | PaperMate Ink Joy 300             |
| 15     | Artline Flow 4-Colour Retractable | 33     | Office Choice Retractable         |
| 16     | Artline Clix 4-Colour             | 34     | COS Capped Ballpoint              |
| 17     | Bic Cristal Easy Glide            | 35     | Staedtler 430                     |
| 18     | Bic Economy                       |        |                                   |

(†) denotes inks selected for ageing and dating studies

(\*) denotes a gel ink formulation

**Table S2:** Absolute and relative standard deviations associated with mean age estimations of validation ink deposits exposed to light. Values are averaged over five replicate spectra.

| Actual Aging Period (Days) | Estimation Error (Days) |       |           |       |           |       |           |        |           |       |           |       |
|----------------------------|-------------------------|-------|-----------|-------|-----------|-------|-----------|--------|-----------|-------|-----------|-------|
|                            | Pen 8                   |       | Pen 10    |       | Pen 11    |       | Pen 19    |        | Pen 23    |       | Pen 26    |       |
|                            | Std. Dev.               | % RSD | Std. Dev. | % RSD | Std. Dev. | % RSD | Std. Dev. | % RSD  | Std. Dev. | % RSD | Std. Dev. | % RSD |
| 0 Day                      | 7.9                     | 16.8  | 18.2      | 137.9 | 7.0       | 28.0  | 7.9       | 119.7  | 16.3      | 111.6 | 22.4      | 147.4 |
| 6 Days                     | 5.1                     | 14.6  | 9.1       | 14.3  | 6.7       | 35.1  | 23.7      | 1247.4 | 17.6      | 119.7 | 15.4      | 132.8 |
| 21 Days                    | 10.0                    | 82.0  | 44.2      | 104.5 | 24.3      | 70.2  | 7.6       | 168.9  | 20.0      | 217.4 | 23.9      | 144.8 |
| 42 Days                    | 7.7                     | 192.5 | 29.7      | 48.1  | 7.5       | 17.0  | 28.9      | 74.1   | 27.6      | 58.6  | 50.2      | 116.7 |
| 98 Days                    | 15.4                    | 39.7  | 69.8      | 250.2 | 7.8       | 8.6   | 11.0      | 15.0   | 25.1      | 20.0  | 68.4      | 43.0  |
| 147 Days                   | 16.5                    | 17.8  | 53.4      | 702.6 | 8.8       | 6.5   | 19.3      | 15.4   | 30.3      | 18.5  | 26.0      | 12.6  |
| 504 Days                   | 46.8                    | 10.3  | 81.5      | 22.8  | 22.8      | 4.9   | 37.1      | 9.0    | 48.1      | 11.5  | 30.7      | 5.6   |
| 596 Days                   | 204.9                   | 47.4  | 99.8      | 24.0  | 28.9      | 5.7   | 19.1      | 4.4    | 72.3      | 15.7  | 33.7      | 6.2   |
| 617 Days                   | 36.1                    | 6.1   | 53.1      | 12.2  | 19.5      | 3.3   | 27.3      | 5.6    | 73.0      | 14.1  | 23.3      | 4.1   |
| 672 Days                   | 26.1                    | 4.1   | 82.4      | 16.1  | 33.5      | 5.4   | 31.9      | 5.8    | 48.5      | 8.2   | 23.4      | 3.8   |

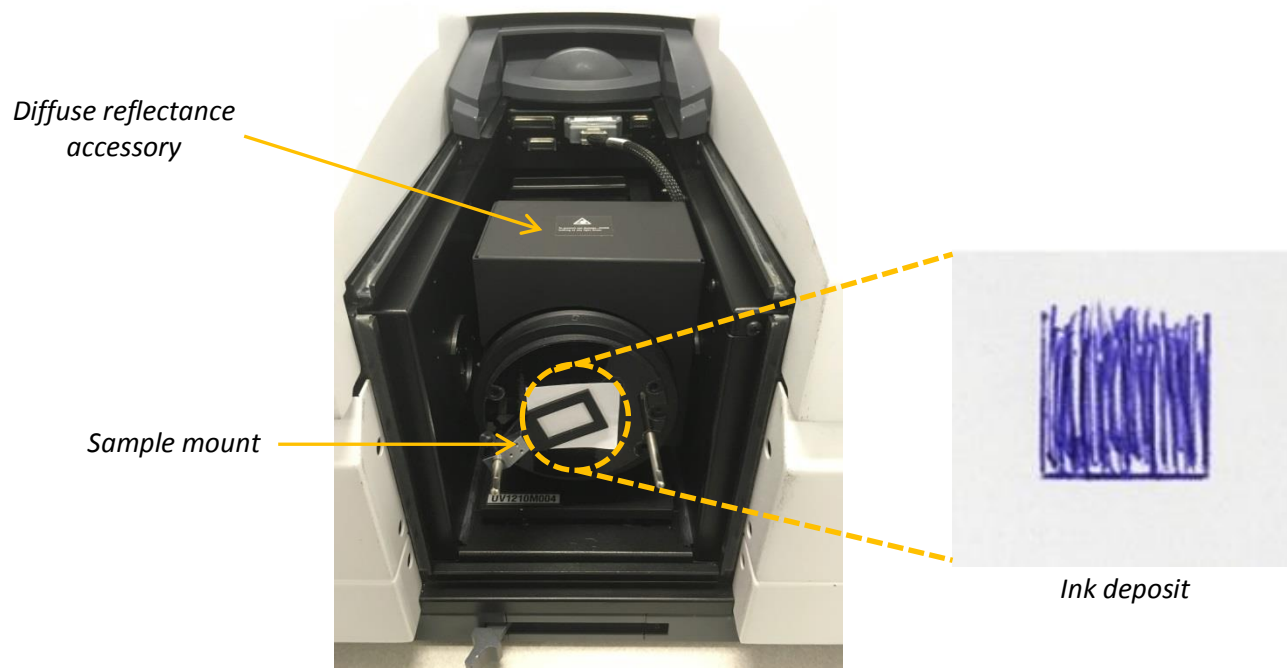

**Figure S1:** Photographic image of (a) a prepared 25 mm x 25 mm ink deposit prepared for ageing studies; and (b) the instrumental set-up utilised for diffuse reflectance visible spectroscopy.

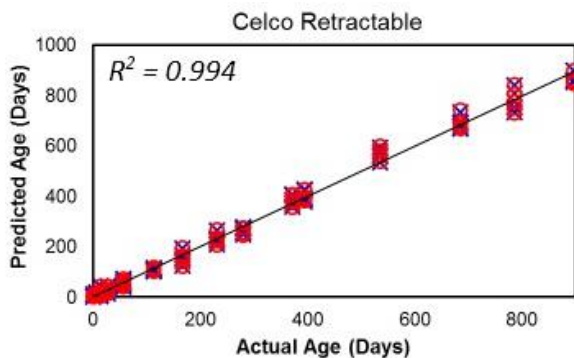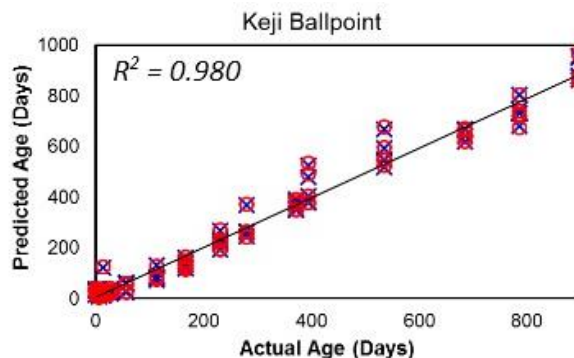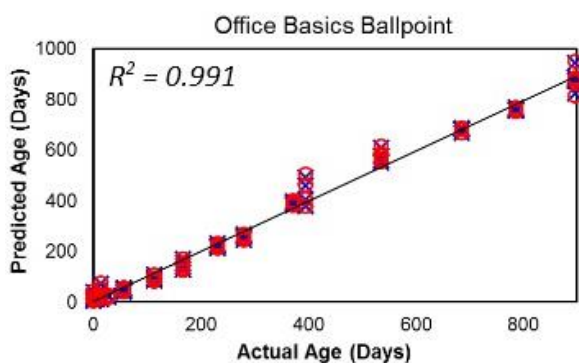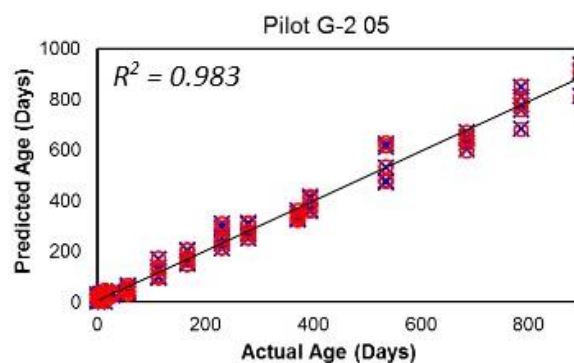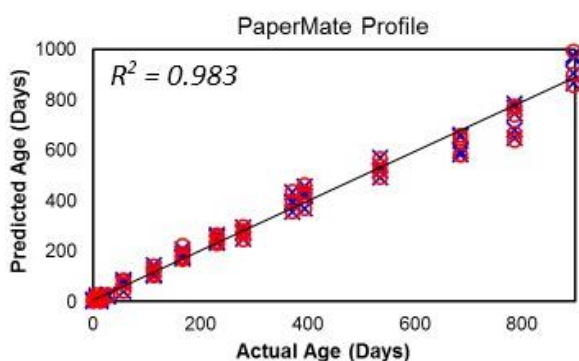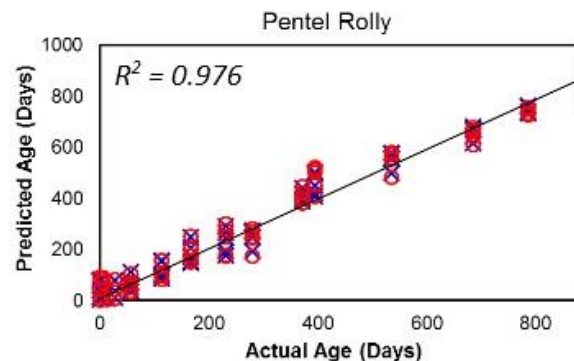

× Calibration ○ Cross-Validation

**Figure S2:** Reference values versus estimated values by PLSR models for the age estimation of six blue ball tip inks exposed to light over a 32-month period.
